# Supplementary material
Source: PubMed Central journal article supplement (PMC4471876)
Supplement: NIHMS698902-supplement-supplement_1.pdf [file NIHMS698902-supplement-supplement_1.pdf]

| Superfamily                        | Family                                                      | Most studied family members                         | Molecular target(s)                                                                                  | Biosynthetic enzymes                                              | Inactivating Enzyme                                                           | CNS cellular targets                                                   | Refs                                                                   |
|------------------------------------|-------------------------------------------------------------|-----------------------------------------------------|------------------------------------------------------------------------------------------------------|-------------------------------------------------------------------|-------------------------------------------------------------------------------|------------------------------------------------------------------------|------------------------------------------------------------------------|
| Anandamide and its analogues       | <i>N</i> -acyl-ethanolamines (anandamide and its congeners) | <i>N</i> -arachidonoyl-ethanolamine (anandamide)    | ↑CB <sub>1</sub> , CB <sub>2</sub><br>↑TRPV1<br>↓TRPM8<br>↓Ca <sub>v</sub> 3.3<br>↑PPAR <sub>γ</sub> | 1) NAPE-PLD<br>2) ABHD4 +GDE1 (sequentially)                      | FAAH                                                                          | Neurons<br>Astrocytes<br>Microglia<br>Endothelium<br>Neural stem cells | 1-12                                                                   |
|                                    |                                                             | <i>N</i> -oleoyl-ethanolamine                       | ↑PPAR <sub>α</sub>                                                                                   |                                                                   | FAAH, FAAH-2                                                                  | Neurons                                                                |                                                                        |
|                                    |                                                             | <i>N</i> -palmitoyl-ethanolamine                    | ↑TRPV1<br>↑GPR119<br>↑GPR55                                                                          |                                                                   | FAAH, NAAA                                                                    | Neurons<br>Microglia                                                   |                                                                        |
| Other long chain fatty acid amides | Primary amides                                              | Oleamide                                            | ↑5-HT <sub>2A,2C</sub><br>↓5-HT <sub>7</sub><br>↑GABA <sub>A</sub><br>↓Gap junctions                 | GLYAT + PAM (sequentially)                                        | FAAH, FAAH-2                                                                  | Neurons<br>Astrocytes<br>Microglia<br>Endothelium                      | 13-14                                                                  |
|                                    | Lipoaminoacids                                              | <i>N</i> -arachidonoyl-glycine                      | ↑GPR18<br>↓Ca <sub>v</sub> 3.2                                                                       | GLYAT-L2                                                          | FAAH                                                                          | Neurons<br>Microglia                                                   | 15-19                                                                  |
|                                    |                                                             | <i>N</i> -arachidonoyl-serine                       | ↓Ca <sub>v</sub> 3.2<br>↑GPR55?                                                                      | ?                                                                 | ?                                                                             | Neural stem cells                                                      |                                                                        |
|                                    |                                                             | <i>N</i> -arachidonoyl-taurine                      | ↑TRPV1<br>↑TRPV4<br>↓Ca <sub>v</sub> 3.2                                                             | ?                                                                 | FAAH                                                                          | Neurons                                                                |                                                                        |
|                                    | Lipo-neurotransmitters                                      | <i>N</i> -arachidonoyl-dopamine                     | ↑TRPV1<br>↓Ca <sub>v</sub> 3.3<br>↑CB <sub>1</sub><br>↓TRPM8<br>↑PPAR <sub>γ</sub>                   | FAAH                                                              | COMT                                                                          | Neurons<br>Astrocytes<br>Endothelium                                   | 8, 15<br>20-22                                                         |
|                                    |                                                             | <i>N</i> -oleoyl-dopamine                           | ↑TRPV1<br>↓Ca <sub>v</sub> 3.3<br>↑GPR119                                                            |                                                                   |                                                                               | Neurons<br>Endothelium                                                 |                                                                        |
|                                    |                                                             | <i>N</i> -arachidonoyl-serotonin                    | ↓Ca <sub>v</sub> 3.3<br>↓TRPV1<br>↓FAAH                                                              | ?                                                                 | Cytochrome P4502U1                                                            | Neurons<br>Astrocytes                                                  |                                                                        |
|                                    |                                                             | <i>N</i> -oleoylserotonin                           | ↑GPR119                                                                                              |                                                                   |                                                                               | ?                                                                      |                                                                        |
|                                    |                                                             | <i>N</i> -arachidonoyl-GABA                         | ↓Ca <sub>v</sub> 3.3                                                                                 | ?                                                                 | ?                                                                             | Neurons                                                                |                                                                        |
|                                    | 2-AG and its analogues                                      | 2-acyl-glycerols (2-AG and its congeners)           | 2-AG                                                                                                 | ↑CB <sub>1</sub> =CB <sub>2</sub><br>↑GABA <sub>A</sub><br>↑TRPV1 | PLCβ + DAGLα or DAGLβ (sequentially)                                          | MAGL<br>ABHD6<br>FAAH<br>ABHD12                                        | Neurons<br>Astrocytes<br>Microglia<br>Endothelium<br>Neural stem cells |
| 2-linoleoyl-glycerol               |                                                             |                                                     | ↑GPR119                                                                                              |                                                                   |                                                                               | ?                                                                      |                                                                        |
| 2-acyl-glycerol ethers             |                                                             | 2-arachidonoyl-glycerol ether (Noladin ether)       | ↑CB <sub>1</sub> >>CB <sub>2</sub>                                                                   | ?                                                                 | Esterification into phospholipids by unknown transacylases                    | Neurons                                                                | 28                                                                     |
|                                    | <i>O</i> -acyl-glycerol esters                              | <i>O</i> -arachidonoyl-glycerol ester (Virodhamine) | ↑↓CB <sub>2</sub> >>CB <sub>1</sub>                                                                  | Non enzymatically, from 2-AG?                                     | FAAH?                                                                         | ?                                                                      | 29                                                                     |
| Anandamide metabolites             | COX-2-derived (Prostamides)                                 | Prostamide F2α                                      | Heterodimer between FP and its Alt4 splicing variant                                                 | COX-2 + prostaglandin F synthases                                 | ?                                                                             | Dorsal horn neurons                                                    | 30-32                                                                  |
|                                    | lipoxygenase-derived                                        | 15-hydroxy-anandamide                               | TRPV1                                                                                                | 15-lipoxygenase + reductase                                       | ?                                                                             | Dorsal horn neurons                                                    | 33                                                                     |
| 2-AG metabolites                   | MAGL-derived                                                | Prostaglandins (E <sub>2</sub> , F <sub>2α</sub> )  | EP1, EP2, EP3, EP4, FP                                                                               | MAGL + COX-2 + prostaglandin synthases (sequentially)             | 15-Hydroxy-prostaglandin dehydrogenase; 15-keto-prostaglandin-Δ(13)-reductase | Neurons<br>Astrocytes<br>Microglia<br>Endothelium                      | 35-37                                                                  |
|                                    | COX-2-derived                                               | Prostaglandin- E2 glycerol ester-                   | Unknown G <sub>q/11</sub> -coupled receptor                                                          | COX-2 + prostaglandin E synthases                                 | ?                                                                             | Striatal neurons<br>Astrocytes?                                        | 30<br>31<br>34                                                         |

**Supplementary Table 1**

The “endocannabinoidome”. Endocannabinoids, endocannabinoid-related mediators and their metabolic enzymes and receptors. Only molecular targets activated ( $\uparrow$ ) or inhibited ( $\downarrow$ ) at low  $\mu\text{M}$  concentrations (or lower) *in vitro* are shown. Abbreviations are defined in the main text, except for: COMT, catechol-O-methyl-transferase; FAAH-2; fatty acid amide hydrolase type-2; GLYAT, glycine

N-acyl-transferase; GLYATL2, GLYAT-like 2; GPR, orphan G-protein coupled receptor; NAAA, N-acylethanolamine acid amidase; PAM, peptidylglycine alpha-amidating monooxygenase; PPAR, peroxisome proliferator-activated nuclear receptor; TRPM8, transient receptor potential of melastatin type-8; TRPV4, transient receptor potential of vanilloid type-4.

**References for Supplementary Table 1**

- Matsuda, L. A., Lolait, S. J., Brownstein, M. J., Young, A. C. & Bonner, T. I. Structure of a cannabinoid receptor and functional expression of the cloned cDNA. *Nature* 346, 561–564 (1990).
- Munro, S., Thomas, K. L. & Abu-Shaar, M. Molecular characterization of a peripheral receptor for cannabinoids. *Nature* 365, 61–65 (1993).
- Di Marzo, V. *et al.* Formation and inactivation of endogenous cannabinoid anandamide in central neurons. *Nature* 372, 686–691 (1994).
- Okamoto, Y., Morishita, J., Tsuboi, K., Tonai, T. & Ueda, N. Molecular characterization of a phospholipase D generating anandamide and its congeners. *J. Biol. Chem.* 279, 5298–5305 (2004).
- Liu, J. *et al.* Multiple pathways involved in the biosynthesis of anandamide. *Neuropharmacology* 54, 1–7 (2008).
- Zygmunt, P. M. *et al.* Vanilloid receptors on sensory nerves mediate the vasodilator action of anandamide. *Nature* 400, 452–457 (1999).
- Bouaboula, M. *et al.* Anandamide induced PPAR $\gamma$  transcriptional activation and 3T3-L1 preadipocyte differentiation. *Eur. J. Pharmacol.* 517, 174–181 (2005).
- De Petrocellis, L. *et al.* Regulation of transient receptor potential channels of melastatin type 8 (TRPM8): effect of cAMP, cannabinoid CB(1) receptors and endovanilloids. *Exp. Cell Res.* 313, 1911–1920 (2007).
- Ahern, G. P. Activation of TRPV1 by the satiety factor oleoylethanolamide. *J. Biol. Chem.* 278, 30429–30434 (2003).
- Ambrosino, P., Soldovieri, M. V., Russo, C. & Tagliabatella, M. Activation and desensitization of TRPV1 channels in sensory neurons by the PPAR $\alpha$  agonist palmitoylethanolamide. *Br. J. Pharmacol.* 168, 1430–1444 (2013).
- Godlewski, G., Offert ler, L., Wagner, J. A. & Kunos, G. Receptors for acylethanolamides-GPR55 and GPR119. *Prostaglandins Other Lipid Mediat.* 89, 105–111 (2009).
- Tsuboi, K. *et al.* Molecular characterization of N-acylethanolamine-hydrolyzing acid amidase, a novel member of the cholesterylglycine hydrolase family with structural and functional similarity to acid ceramidase. *J. Biol. Chem.* 280, 11082–11092 (2005).
- Cravatt, B. F. *et al.* Molecular characterization of an enzyme that degrades neuromodulatory fatty-acid amides. *Nature* 384, 83–87 (1996).
- Thomas, E. A., Cravatt, B. F. & Sutcliffe, J. G. The endogenous lipid oleamide activates serotonin 5-HT7 neurons in mouse thalamus and hypothalamus. *J. Neurochem.* 72, 2370–2378 (1999).
- Chemin, J., Cazade, M. & Lory, P. Modulation of T-type calcium channels by bioactive lipids. *Pflugs Arch.* 466, 689–700 (2014).
- Farrel E. K. & Merkler D. J. Biosynthesis, degradation and pharmacological importance of the fatty acid amides. *Drug Discov. Today* 13, 558–568 (2008).
- Kohno, M. *et al.* Identification of N-arachidonoylglycine as the endogenous ligand for orphan G-protein-coupled receptor GPR18. *Biochem. Biophys. Res. Commun.* 347, 827–832 (2006).
- Ho, W. S. Angiogenesis: a new physiological role for N-arachidonoyl serine and GPR55? *Br. J. Pharmacol.* 160, 1580–1582 (2010).
- Waluk, D. P., Viefort, K., Derakhshan, S., Aro, H. & Hunt, M. C. N-Acyl taurines trigger insulin secretion by increasing calcium flux in pancreatic  $\beta$ -cells. *Biochem. Biophys. Res. Commun.* 430, 54–59 (2013).
- Huang, S. M. *et al.* An endogenous capsaicin-like substance with high potency at recombinant and native vanilloid VR1 receptors. *Proc. Natl. Acad. Sci. USA* 99, 8400–8405 (2002).
- Chu, Z. L. *et al.* N-oleoyldopamine enhances glucose homeostasis through the activation of GPR119. *Mol. Endocrinol.* 24, 161–170 (2010).
- Maione, S. *et al.* Analgesic actions of N-arachidonoyl-serotonin, a fatty acid amide hydrolase inhibitor with antagonistic activity at vanilloid TRPV1 receptors. *Br. J. Pharmacol.* 150, 766–781 (2007).
- Gonsiorek, W. *et al.* Endocannabinoid 2-arachidonoyl glycerol is a full agonist through human type 2 cannabinoid receptor: antagonism by anandamide. *Mol. Pharmacol.* 57, 1045–1050 (2000).
- Bisogno, T. *et al.* Cloning of the first sn1-DAG lipases points to the spatial and temporal regulation of endocannabinoid signaling in the brain. *J. Cell Biol.* 163, 463–468 (2003).
- Sigel, E. *et al.* The major central endocannabinoid directly acts at GABA(A) receptors. *Proc. Natl. Acad. Sci. USA* 108, 18150–18155 (2011).
- Zygmunt, P. M. *et al.* Monoacylglycerols activate TRPV1—a link between phospholipase C and TRPV1. *PLoS One* 8, e81618 (2013).
- Hansen, H. S., Rosenkilde, M. M., Holst, J. J. & Schwartz, T. W. GPR119 as a fat sensor. *Trends Pharmacol. Sci.* 33, 374–381 (2012).
- Hanus, L. *et al.* 2-arachidonoyl glyceryl ether, an endogenous agonist of the cannabinoid CB1 receptor. *Proc. Natl. Acad. Sci. USA* 98, 3662–3665 (2001).
- Porter, A. C. *et al.* Characterization of a novel endocannabinoid, virodhamine, with antagonist activity at the CB1 receptor. *J. Pharmacol. Exp. Ther.* 301, 1020–1024 (2002).
- Alhouayek, M. & Muccioli, G. G. COX-2-derived endocannabinoid metabolites as novel inflammatory mediators. *Trends Pharmacol. Sci.* (2014).
- Woodward D. F. *et al.* The pharmacology and therapeutic relevance of endocannabinoid derived cyclo-oxygenase (COX)-2 products. *Pharmacol. Ther.* 120, 71–80 (2008).
- Gatta, L. *et al.* Discovery of prostamide F2 $\alpha$  and its role in inflammatory pain and dorsal horn nociceptive neuron hyperexcitability. *PLoS One* 7, e31111 (2012).
- Starowicz, K. *et al.* Full inhibition of spinal FAAH leads to TRPV1-mediated analgesic effects in neuropathic rats and possible lipoxigenase-mediated remodeling of anandamide metabolism. *PLoS One* 8, e60040 (2013).
- Valdeolivas, S. *et al.* The inhibition of 2-arachidonoyl-glycerol (2-AG) biosynthesis, rather than enhancing striatal damage, protects striatal neurons from malonate-induced death: a potential role of cyclooxygenase-2-dependent metabolism of 2-AG. *Cell Death Dis.* 4, e862 (2013).
- Nomura, D. K. *et al.* Endocannabinoid hydrolysis generates brain prostaglandins that promote neuroinflammation. *Science* 334, 809–813 (2011).
- Chen, X., Zhang, J. & Chen, C. Endocannabinoid 2-arachidonoylglycerol protects neurons against  $\beta$ -amyloid insults. *Neuroscience* 178, 159–168 (2011).
- Chen, R. *et al.* Monoacylglycerol lipase is a therapeutic target for Alzheimer's disease. *Cell Rep.* 2, 1329–1339 (2012).
